# Supplementary material
Source: publisher site journal article supplement (https://www.dovepress.com/article/552705)
Supplement: Supplementary file 1 [file 552705.doc]

| **Theme** | **Subcategory** | **Quote (Verbatim)** | **Attribution** |
| --- | --- | --- | --- |
| Support System | Referral & Delay | “...It has been insisted for 8 months by me to take her to the doctor... But she insisted on waiting…” | Family #3 (F3) |
| Support System | Chronology of Death | “...Her breathing was rapid, and then she vomited... From the midwife’s house to the hospital, she was carried on a mattress…” | Family #1 (F3) |
| Support System | Family Acceptance | “...I just cried. If I had been angry, thankfully I wasn’t because I knew… It was dark, I wasn’t aware.” | Family #3 (F3) |
| Support System | Barriers | “I was just waiting for that, only waiting for the oxygen...” | Family #1 (F1) |
| Support System | Nutrition | “Yes, I enjoy that meat; I often eat it.” | Family #3 (F3) |
| Healthcare Provider | Midwife Experience | “There were no contractions... bleeding continued… and she died in transport.” | Midwife #6 (P3) |
| Healthcare Provider | Comorbidity Case | “Yes, with asthma... anemia... the mother gave birth, bled, and died...” | Midwife #5 (P2) |
| Recording & Reporting | Manual Barriers | “Most of the time, if there are many users, the server tends to go down.” | Staff #9 (R1) |

Supplementary Table 1: Extended Narrative Quotes
